# Supplementary material for: Long-term observations of cloud condensation nuclei in the Amazon rain forest – Part 2: Variability and characteristic differences under near-pristine, biomass burning, and long-range transport conditions
Source: Copernicus journal article supplement (doi:10.5194/acp-2017-847), 2017-10-10
Supplement: Supplementary file [file acp-2017-847-AC3-supplement.pdf]

## **Response to Gilberto Fisch (editor)**

Manuscript: **M. L. Pöhlker et al., Long-term observations of cloud condensation nuclei over the Amazon rain forest – Part 2: Variability and characteristics of biomass burning, long-range transport, and pristine rain forest aerosols**, ACP-2017-847)

### Editor comment:

Dear Dra. Pöhlker

You have received comments/suggestions from 2 reviewers. They have raised very good points and I would like to encourage you to reflect and properly answer them. Once you upload the new version, please also send me a letter answering each comments made.

best regards gfisch

### Author Response:

Dear Prof. Fisch,

we fully agree that both reviewers brought up important aspects and we highly appreciate this constructive criticism. In fact, the reviewers' comments encouraged us to revise the manuscript profoundly, which clearly improved the quality of the manuscript. Furthermore, the revision extended the scope and relevance of the study. All comments brought up by the reviewers have been addressed point-by-point in our responses.

In the course of the revision, we have implemented two new sections (Sect. 2.7 and 3.8 in the revised version), one new main text figure (Fig. 10 in the revised version), and seven new supplement figures. We further revised and improved the entire text as well as all figures and tables. The changes in the manuscript are marked with blue font.

We would like to thank you at this point for your constructive contributions and pleasant help with the review process.

Best regards,

Mira Pöhlker and coauthors
